# Supplementary material for: Increased Frequencies of Switched Memory B Cells and Plasmablasts in Peripheral Blood from Patients with ANCA‐Associated Vasculitis
Source: Hindawi journal article supplement (doi:10.1155/2020/8209737), 2020-01-01
Supplement: f1 [file 8209737.f1.pdf]

# Supplementary Materials

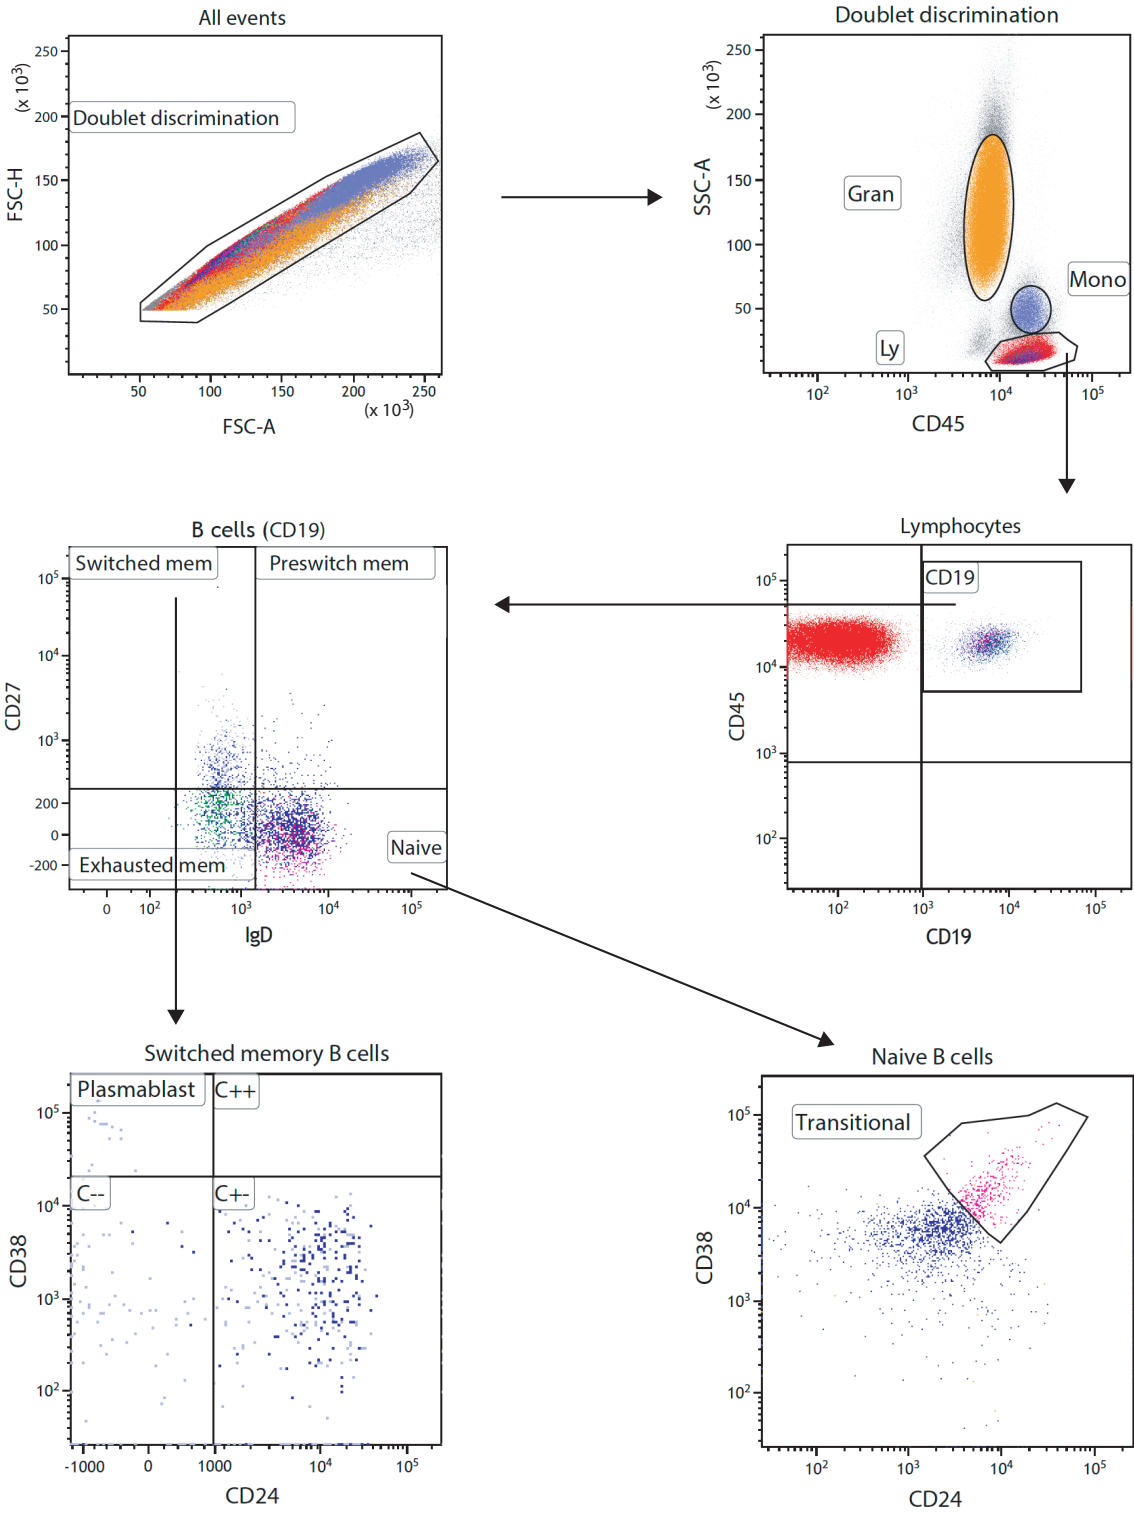

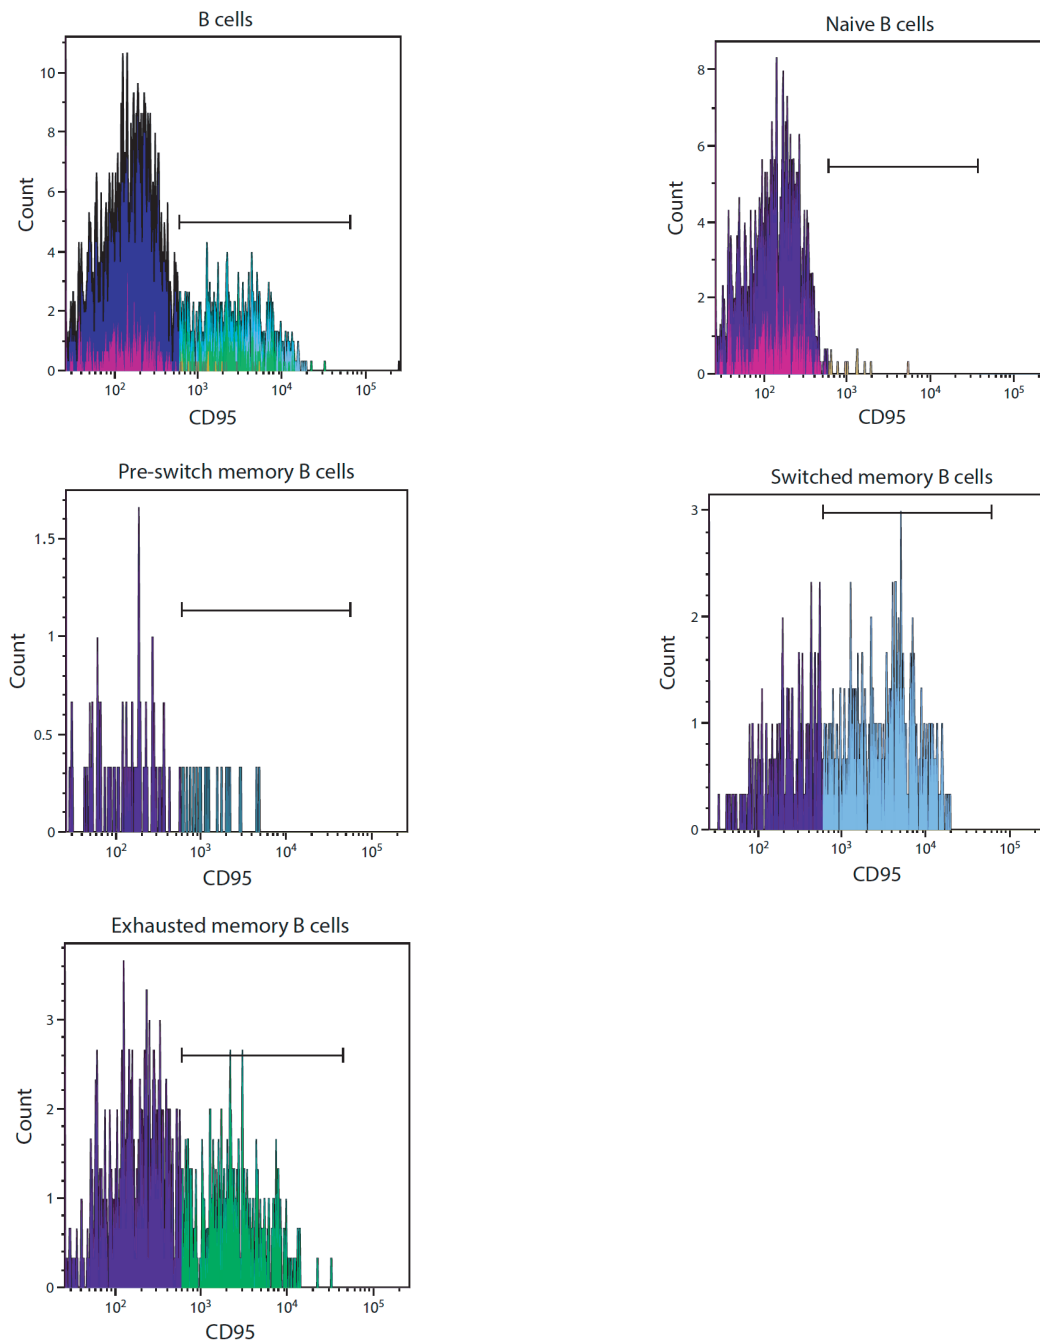

**Supplementary Figure 1.** Gating strategy for B cell subsets. A gate was first set on all events using the FSC-H/FSC-A plot for doublet discrimination. Then, a gate was set on lymphocytes using the SSC-A/CD45 plot. Within the lymphocytes CD19<sup>+</sup> B cells were gated using the CD45/CD19 plot. B cells were subsequently divided into naive B cells (CD19<sup>+</sup>CD27<sup>+</sup>IgD<sup>+</sup>), pre-switch memory B cells (CD19<sup>+</sup>CD27<sup>+</sup>IgD<sup>+</sup>), switched memory B cells (CD19<sup>+</sup>CD27<sup>+</sup>IgD<sup>-</sup>) and exhausted memory B cells (CD19<sup>+</sup>CD27<sup>-</sup>IgD<sup>-</sup>) using the CD27/IgD plot. Within the naive B cells, the transitional B cells (CD19<sup>+</sup>CD27<sup>+</sup>IgD<sup>+</sup>CD24<sup>+</sup>CD38<sup>++</sup>) were gated using the CD38/CD24 plot. Within the switched memory B cells, the plasmablasts (CD19<sup>+</sup>CD27<sup>+</sup>IgD<sup>-</sup>CD24<sup>+</sup>CD38<sup>++</sup>) were gated using the CD38/CD24 plot. Activated (CD95<sup>+</sup>) B cells were gated within the respective population using the CD95 plot. The figure shows an example from a patient with anti-neutrophil cytoplasmic antibody (ANCA)-associated vasculitis (AAV).

## Supplementary Table 1

Frequencies of B cells and subsets in patients with AAV with regard to medication

| Phenotype                                                              | AAV with<br>≥1 drugs (n=80)         | AAV no medication<br>(n=26)     | HBD<br>(n=134)      |
|------------------------------------------------------------------------|-------------------------------------|---------------------------------|---------------------|
| <b>BVAS3, median (range)</b>                                           | 0 (0-26)                            | 0 (0-21)                        |                     |
| <b>B cells (% of lymphocytes)</b>                                      | 4.29 (2.65-6.74) <sup>a,b</sup>     | 9.36 (7.39-13.7)                | 8.33 (5.98-11.6)    |
| <b>B cells (10<sup>6</sup>/L)*</b>                                     | 21.5 (10.3-45.0) <sup>a</sup>       | 86.1 (40.3-153)                 |                     |
| <b>B cell subsets (% of B cells)</b>                                   |                                     |                                 |                     |
| <b>Naive</b>                                                           | 44.6 (27.9-56.4) <sup>a,b</sup>     | 65.3 (51.2-71.9)                | 56.7 (47.9-67.0)    |
| <b>Pre-switch memory</b>                                               | 7.21 (4.40-10.7) <sup>a</sup>       | 4.29 (2.66-6.35) <sup>c</sup>   | 7.00 (4.65-10.2)    |
| <b>Switched memory</b>                                                 | 24.3 (17.3-34.4) <sup>a,b</sup>     | 9.94 (6.78-16.8)                | 16.5 (11.4-21.8)    |
| <b>Exhausted memory</b>                                                | 21.1 (14.9-25.6) <sup>b</sup>       | 21.6 (11.4-26.2)                | 17.4 (12.0-21.6)    |
| <b>Transitional</b>                                                    | 0.235 (0.00500-1.74) <sup>a,b</sup> | 3.65 (1.61-6.10)                | 4.44 (2.83-6.18)    |
| <b>Plasmablasts</b>                                                    | 1.00 (0.468-2.49) <sup>b</sup>      | 0.565 (0.348-1.13) <sup>c</sup> | 0.320 (0.160-0.613) |
| <b>Activated B cells and subsets</b>                                   |                                     |                                 |                     |
| <b>CD95<sup>+</sup> B cells<br/>(% of B cells)</b>                     | 25.6 (14.9-35.7) <sup>a,b</sup>     | 12.3 (6.88-17.1)                | 10.3 (7.24-15.5)    |
| <b>CD95<sup>+</sup> naive<br/>(% of naive)</b>                         | 4.75 (1.98-9.38) <sup>a,b</sup>     | 1.16 (0.518-2.86)               | 1.02 (0.575-1.71)   |
| <b>CD95<sup>+</sup> pre-switch memory<br/>(% of pre-switch memory)</b> | 31.1 (16.8-41.1) <sup>a,b</sup>     | 17.1 (9.93-28.9)                | 13.5 (9.07-19.8)    |
| <b>CD95<sup>+</sup> switched memory<br/>(% of switched memory)</b>     | 60.8 (52.2-72.9) <sup>b</sup>       | 56.4 (40.7-77.7) <sup>c</sup>   | 44.6 (36.0-51.9)    |
| <b>CD95<sup>+</sup> exhausted memory<br/>(% of exhausted memory)</b>   | 27.8 (18.0-38.6) <sup>a,b</sup>     | 16.1 (9.13-25.4)                | 14.0 (8.38-18.2)    |

Frequencies of B cells (CD19<sup>+</sup> lymphocytes) and subsets analysed in patients and healthy controls using flow cytometry. The patients were either medicated with ≥1 of the following medications; prednisolone, azathioprine, methotrexate, mycophenolate mofetil, cyclophosphamide, or none of them. Kruskal-Wallis with Dunn's multiple comparisons test was used to calculate level of significance. Mann-Whitney test was used to calculate level of significance for absolute values. Data are presented with medians and interquartile ranges. AAV anti-neutrophil cytoplasmic autoantibody (ANCA)-associated vasculitis, HBD healthy blood donors, BVAS3 Birmingham Vasculitis Activity Score version 3. <sup>a</sup>Denotes significant difference between "AAV with ≥1" drugs and "AAV no medication". <sup>b</sup>Denotes significant difference between "AAV with ≥1" drugs and HBD. <sup>c</sup>Denotes significant difference between "AAV no medication" and HBD. \*n equals 76 (AAV with ≥1 drugs), 25 (AAV no medication) for absolute values.
